# Supplementary material for: Hijacking of the O-GlcNAcZYME complex by the HTLV-1 Tax oncoprotein facilitates viral transcription
Source: PubMed Central journal article supplement (PMC5542696; doi:10.1371/journal.ppat.1006518), 2017-07-24

# S2 Fig

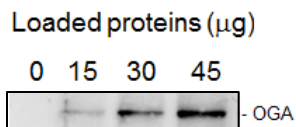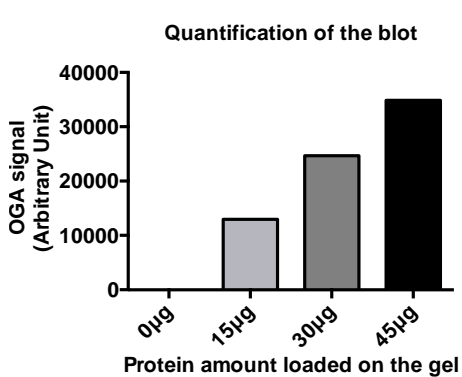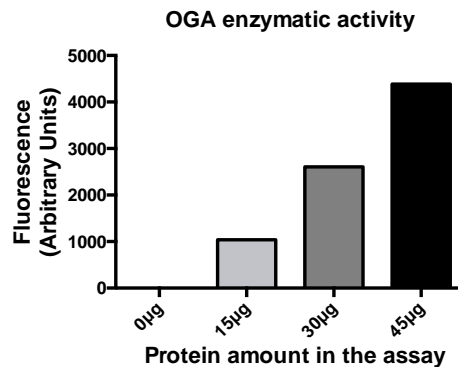

### Correlation OGA protein /OGA activity

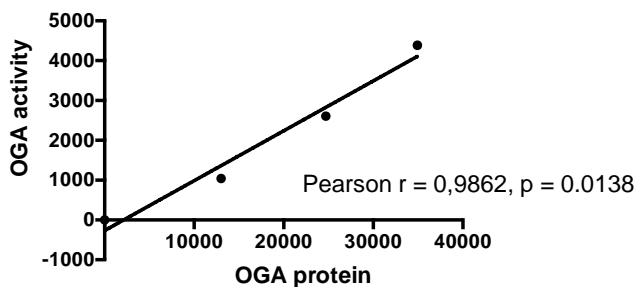

Supplement: ppat.1006518.s002.pdf [file ppat.1006518.s002.pdf]
